# Supplementary material for: Lifestyle Modification for Enhancing Autonomic Cardiac Regulation in Children: The Role of Exercise
Source: Children (Basel). 2019 Nov 16;6(11):127. doi: 10.3390/children6110127 (PMC6915468; doi:10.3390/children6110127)
Supplement: Supplementary file 1 [file children-06-00127-s001.pdf]

Table S1: Summary of Accepted Articles.

| Author (Date)              | Participants                                                                 | Aim                                                                                                                                                                               | Exercise Sub-Topic                                                                                                                                                                                          | Findings                                                                                                                                                                                                   |
|----------------------------|------------------------------------------------------------------------------|-----------------------------------------------------------------------------------------------------------------------------------------------------------------------------------|-------------------------------------------------------------------------------------------------------------------------------------------------------------------------------------------------------------|------------------------------------------------------------------------------------------------------------------------------------------------------------------------------------------------------------|
| van Biljon et al. (2018)   | - <i>n</i> = 109 (M and F)<br>-Age: 10 – 13 years old<br>-Condition: healthy | To investigate the impact of 3 isocaloric exercise programs on cardiac ANS functioning in children                                                                                | -Mode: HITT, MICT and ALT<br>-HITT duration: 23-min<br>-MICT duration: 33-min<br>-Frequency: 3 days/week<br>-Intensity: moderate and high intensity<br>-Intervention length: 5 weeks                        | -HITT resulted in significant enhancements in HRV compared with MICT and ALT<br>-Findings suggest that both magnitude and the components of the ANS relate to exercise intensity                           |
| Cohen-Holzer et al. (2017) | - <i>n</i> = 24 (M and F)<br>-Age: 6 – 10 years old<br>-Condition: UCP       | To examine the influence of an intensive hybrid program on cardiac autonomic regulation, walking endurance and the correlation with upper extremity function of children with UCP | -Mode: aerobic<br>-Duration: 6 hours/day<br>-Frequency: 5 days/week<br>-Intervention length: 2 weeks                                                                                                        | A significant increase in HRV (RMSSD) at post- and 3-months post-intervention was noted as well as walking improvement and arm function                                                                    |
| Sharma et al. (2017)       | - <i>n</i> = 439 (M and F)<br>-Age: 12 – 17 years old<br>-Condition: healthy | To compare the effect of structured and unstructured exercise on maximal aerobic capacity and HRV among adolescents                                                               | -Mode: structured (muscle and bone strengthening exercise and stretching) vs unstructured PA<br>-Duration: 2 hours/day<br>-Frequency: 6 days/week<br>-Intensity: vigorous<br>-Intervention length: 6 months | HRV increased significantly from pre- to post-testing for both interventions however structured PA was more beneficial for improving HRV than unstructured PA irrespective of gender and sports activities |
| Farinatti et al. (2016)    | - <i>n</i> = 44 (M and F)<br>-Age: 13 – 17 years<br>-Condition: obese        | To investigate the effects of RT on HRV in obese teens                                                                                                                            | -Mode: RT circuit<br>-Duration: 30-40-min<br>-Frequency: 3 days/week<br>-Intervention length: 12 weeks                                                                                                      | -RT attenuated ANS dysfunction in obese adolescents by increasing PNS activity and decreasing sympathovagal balance<br>-PNS indices increased and baseline differences between obese and                   |

|                       |                                                                        |                                                                                                                                                                                                 |                                                                                                                                                   |                                                                                                                                                                                               |
|-----------------------|------------------------------------------------------------------------|-------------------------------------------------------------------------------------------------------------------------------------------------------------------------------------------------|---------------------------------------------------------------------------------------------------------------------------------------------------|-----------------------------------------------------------------------------------------------------------------------------------------------------------------------------------------------|
|                       |                                                                        |                                                                                                                                                                                                 |                                                                                                                                                   | healthy groups were no longer observed after RT                                                                                                                                               |
| Bond et al. (2015)    | -n = 13 (M and F)<br>-Age: 13 – 14 years old<br>-Condition: healthy    | To identify the influence of of HITT on CVD risk factors in fasted and postprandial states in adolescents                                                                                       | - Mode: aerobic (HITT cycling)<br>-Intervention length: 2 weeks                                                                                   | -HITT improved HRV in adolescents<br>-Most improvements in HRV were lost 3 days after HITT                                                                                                    |
| Shin et al. (2014)    | -n = 15 (M only)<br>-Age: ~13 years old<br>-Condition: type 1 diabetes | To investigate the effect of exercise on ANS CV risk profiles in children with type 1 diabetes                                                                                                  | -Mode: aerobic (walking)<br>-Frequency: 3x/week<br>-Intensity: moderate<br>-Intervention length: 12 weeks                                         | TP, LF and VLF significantly increased after exercise training                                                                                                                                |
| Satish et al. (2013)  | -n = 24 (M and F)<br>-Age: 11 – 13 years old<br>-Condition: healthy    | To evaluate the effect of yoga on HRV as a stress index in sub-junior cyclists                                                                                                                  | -Mode: yoga<br>-Duration: 1 hour<br>-Frequency: 7 days/week<br>-Intervention length: 4 weeks                                                      | -Yoga significantly decreased LF and LF/HF and increased HF<br>-HF significantly decreased in the control group                                                                               |
| Prado et al. (2010)   | -n = 33 (M and F)<br>-Age: 10 years old<br>-Condition: obese           | To test the hypothesis that in obese children: 1) hypocaloric diet improves HRR and cardiac ANS activity and 2) diet and exercise combined leads to greater improvement in HRR and ANS activity | -Mode: aerobic<br>-Duration: 1 hour<br>-Frequency: 3 days/week<br>-Intervention length: 4 months                                                  | -Obese children in the diet and exercise group had greater improvements in ANS activity<br>-Obese children in the diet only group showed no difference in ANS activity after the intervention |
| Gamelin et al. (2009) | -n = 38 (M and F)<br>-Age: ~ 9 years old<br>-Condition: healthy        | To observe the effect of high intermittent exercise training on children's HRV                                                                                                                  | -Mode: aerobic (running)<br>-Duration: 30-min<br>-Frequency: 3 days/week<br>-Intensity: maximal and supramaximal<br>-Intervention length: 7 weeks | No significant differences were found in HRV between the exercise intervention and control groups                                                                                             |

|                         |                                                                             |                                                                                                        |                                                                                                                                      |                                                                                                                                                                                                                                                       |
|-------------------------|-----------------------------------------------------------------------------|--------------------------------------------------------------------------------------------------------|--------------------------------------------------------------------------------------------------------------------------------------|-------------------------------------------------------------------------------------------------------------------------------------------------------------------------------------------------------------------------------------------------------|
| Nagai et al. (2004)     | - <i>n</i> = 305 (M and F)<br>-Age: 6 – 11 years old<br>-Condition: healthy | To investigate the effect of a long-term moderate exercise program on ANS activity in healthy children | -Mode: aerobic<br>-Duration: 20-min<br>-Frequency: 5 days/week<br>-Intensity: moderate<br>-Intervention length: 12 months            | -12 months of short duration moderate exercise training has a positive effect on ANS activity in children who initially had a low HRV<br>-In the low HRV group, all HRV indices significantly increased after training                                |
| Mandigout et al. (2002) | - <i>n</i> = 19 (M and F)<br>-Age: 10 – 11 years old<br>-Condition: healthy | To evaluate the effect of an endurance training program on HRV in prepubertal healthy children         | -Mode: aerobic<br>-Duration: 1 hour<br>-Frequency: 3 days/week<br>-Intensity: vigorous<br>-Intervention length: 13 weeks             | Exercise significantly increased global HRV as compared to the controls                                                                                                                                                                               |
| Gutin et al. (2000)     | - <i>n</i> = 79 (M and F)<br>-Age: 7 – 11 years old<br>-Condition: obese    | To investigate changes over an 8-month period in 2 groups of obese children                            | -Mode: aerobic<br>-Duration: 40-min<br>-Frequency: 5 days/week<br>-Intensity: moderate to vigorous<br>-Intervention length: 4 months | -Regular exercise had a favourable effect on PNS activity in obese children<br>-RMSSD increased in the 4-month period during which children received the intervention and then declined in the 4-month period following cessation of the intervention |
| Gutin et al. (1997)     | - <i>n</i> = 35 (M and F)<br>-Age: 7 – 11 years old<br>-Condition: obese    | To investigate whether physical training would shift the balance of ANS activity in obese children     | -Mode: aerobic<br>-Duration: 40-min<br>-Frequency: 5 days/week<br>-Intensity: moderate to vigorous<br>-Intervention length: 4 months | Compared to the control group, the trained group demonstrated increased RMMSD, decreased LF and decreased LF/HF                                                                                                                                       |

Note: **M**, Males; **F**, Females; **ANS**, autonomic nervous system; **HRV**, heart rate variability; **PNS**, parasympathetic nervous system; **CVD**, cardiovascular disease; **CV**, cardiovascular; **HITT**, high intensity interval training; **MICT**, moderate intensity interval training; **ACT**, alternate HITT and MICT; **PA**, physical activity; **HRR**, heart rate recovery; **UCP**, unilateral cerebral palsy; **RT**, resistance training; **SDNN**, standard deviation of normal-to-normal interbeat intervals; **RMSSD**, root mean square of successive differences; **TP**, total power; **VLF**, very low frequency; **LF**, low frequency; **HF**, high frequency; **LF/HF**, the ratio between low and high frequency
